# Supplementary material for: Self-administered versus lymphedema therapist-administered complex decongestive therapy protocol in breast cancer-related lymphedema: a non-inferiority randomized controlled trial with three-month follow-up
Source: Springer Nature journal article supplement (doi:10.1007/s10549-025-07709-3), 2025-05-06
Supplement: MOESM1 [file 10549_2025_7709_MOESM1_ESM.pdf]

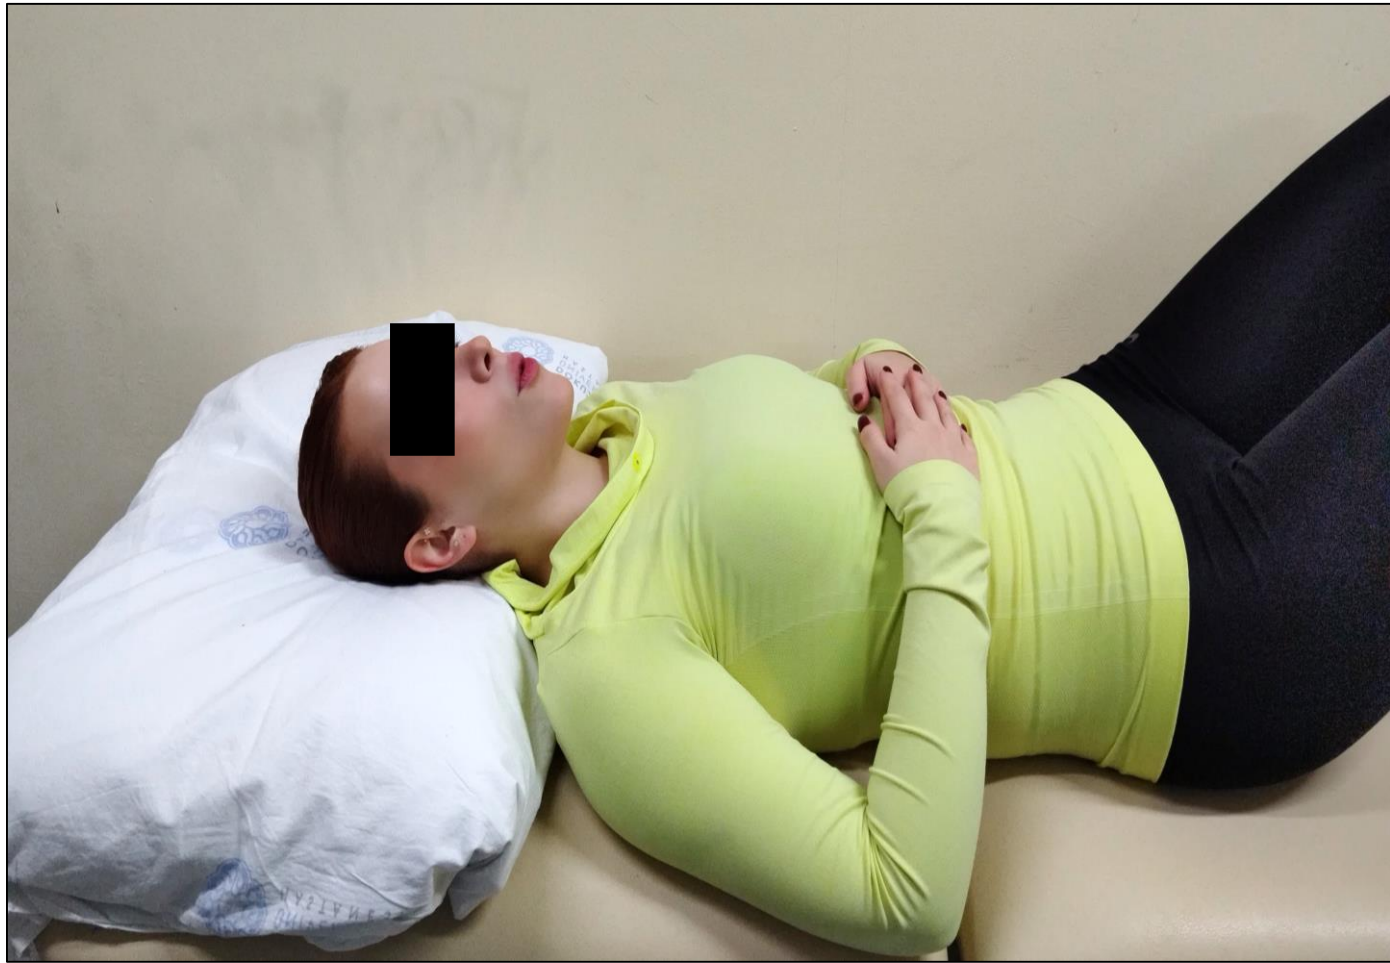

Diaphragmatic Breathing

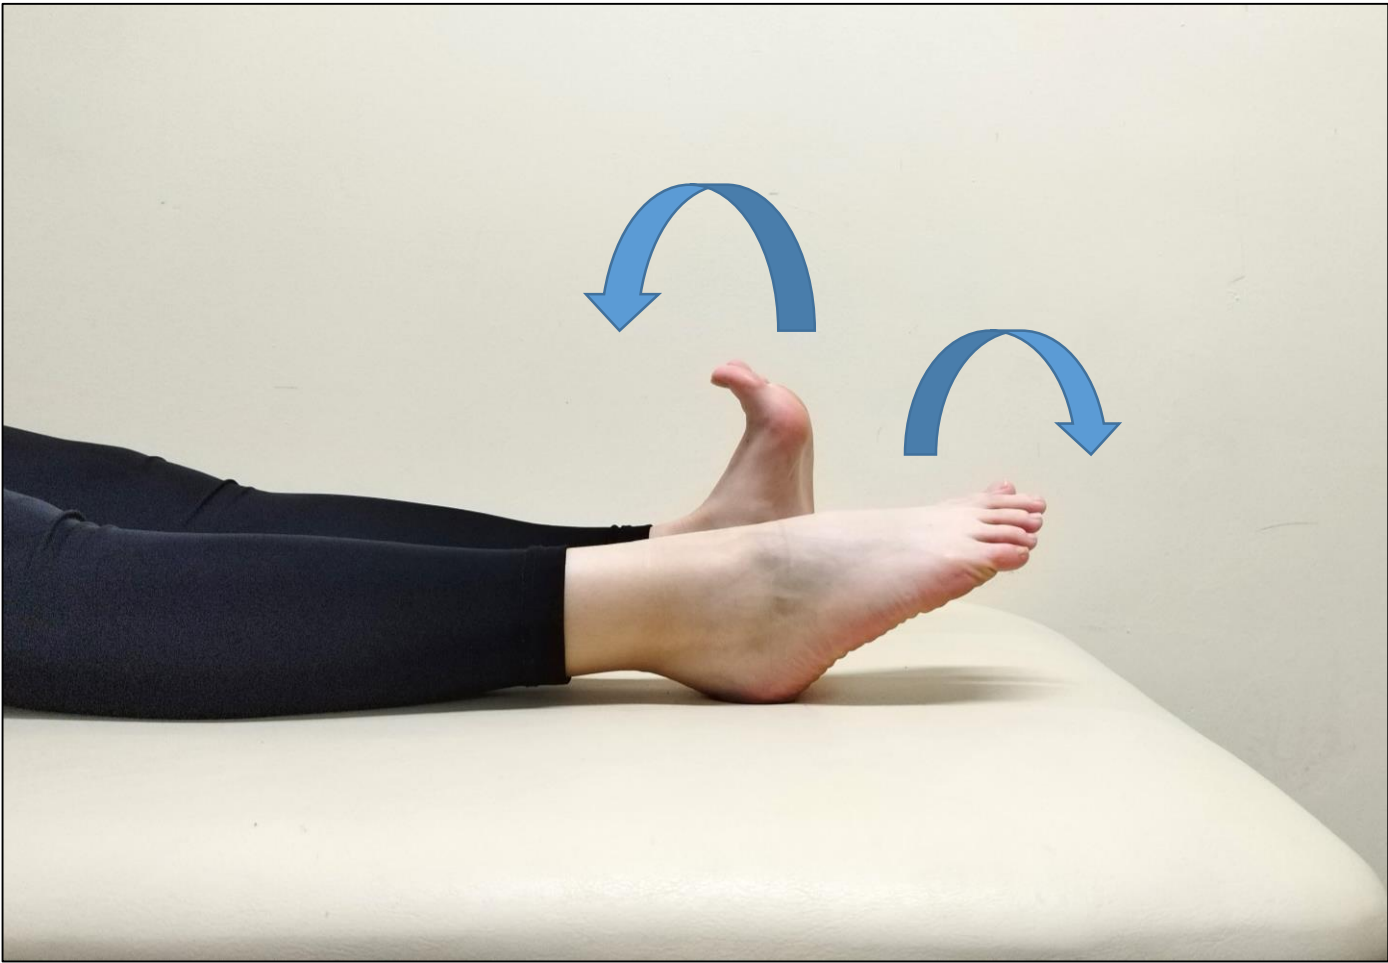

Ankle Pumping

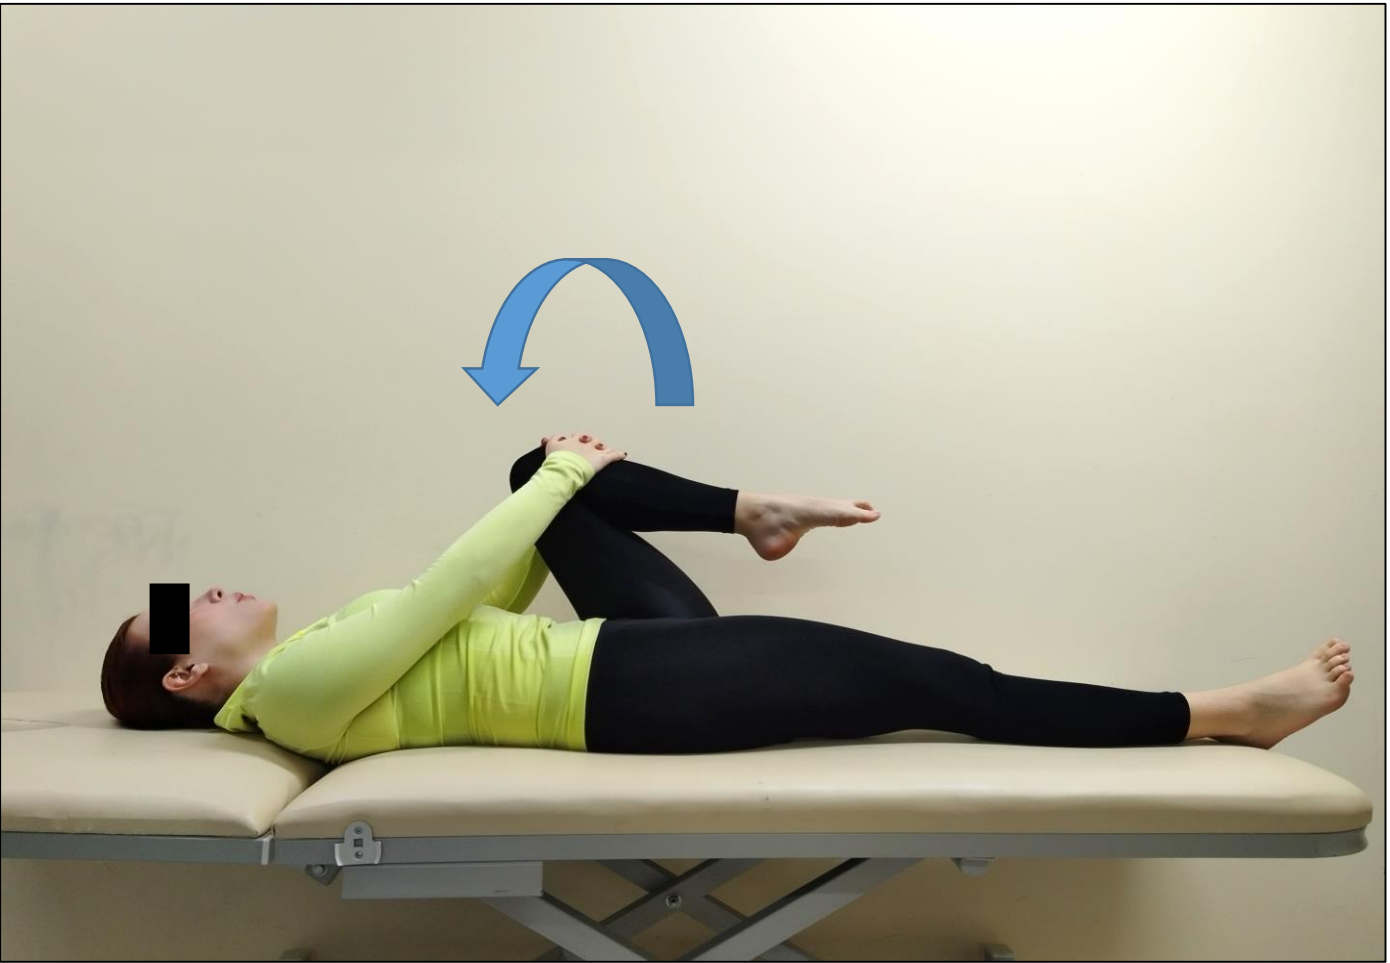

Bilateral Hip Flexor Stretching

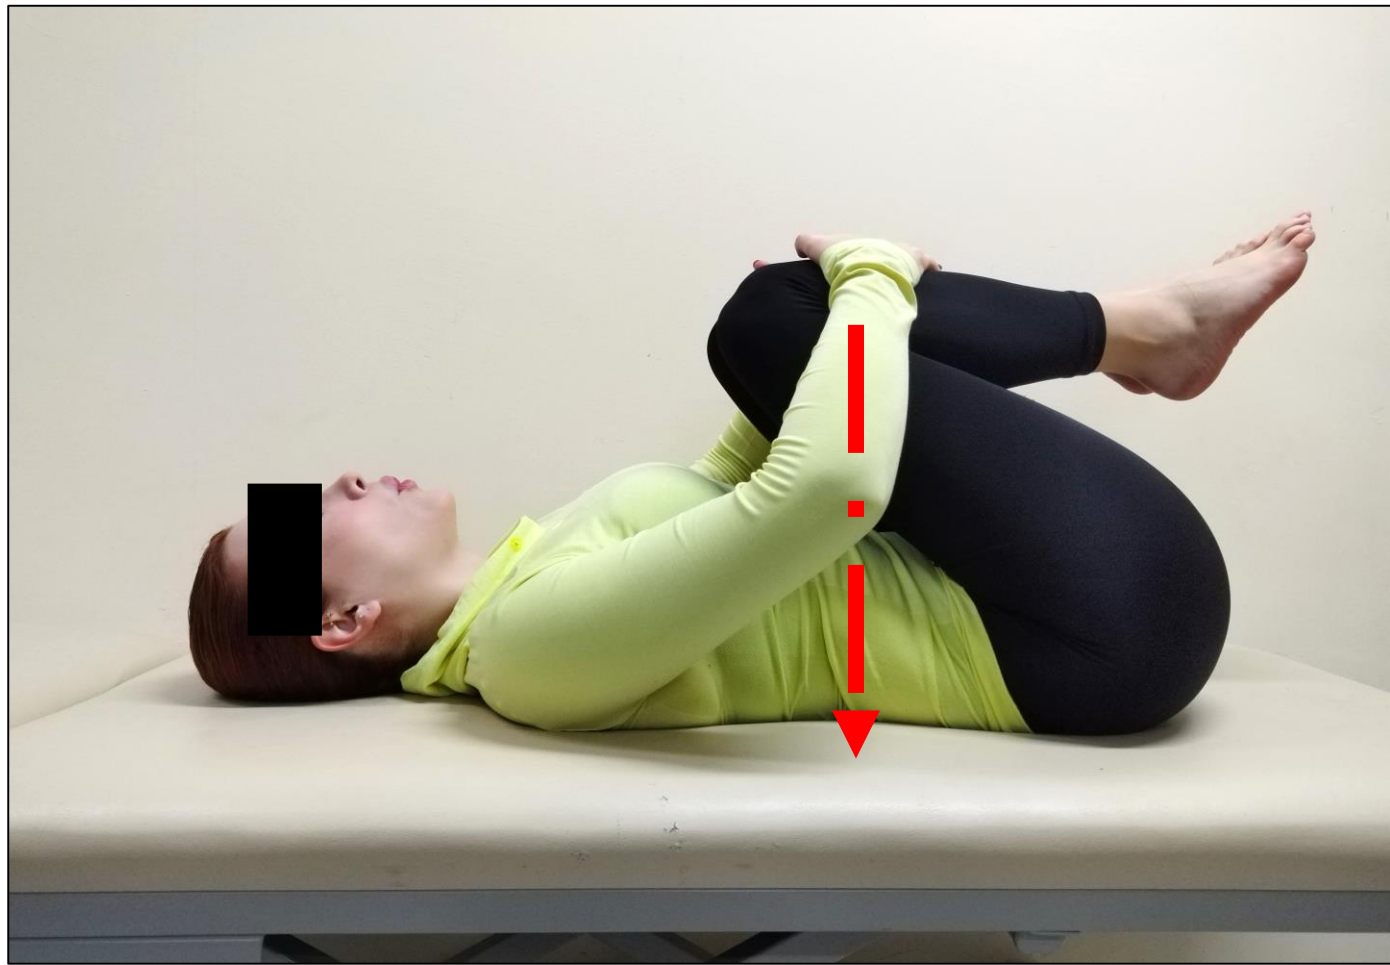

Lumbar Stretching

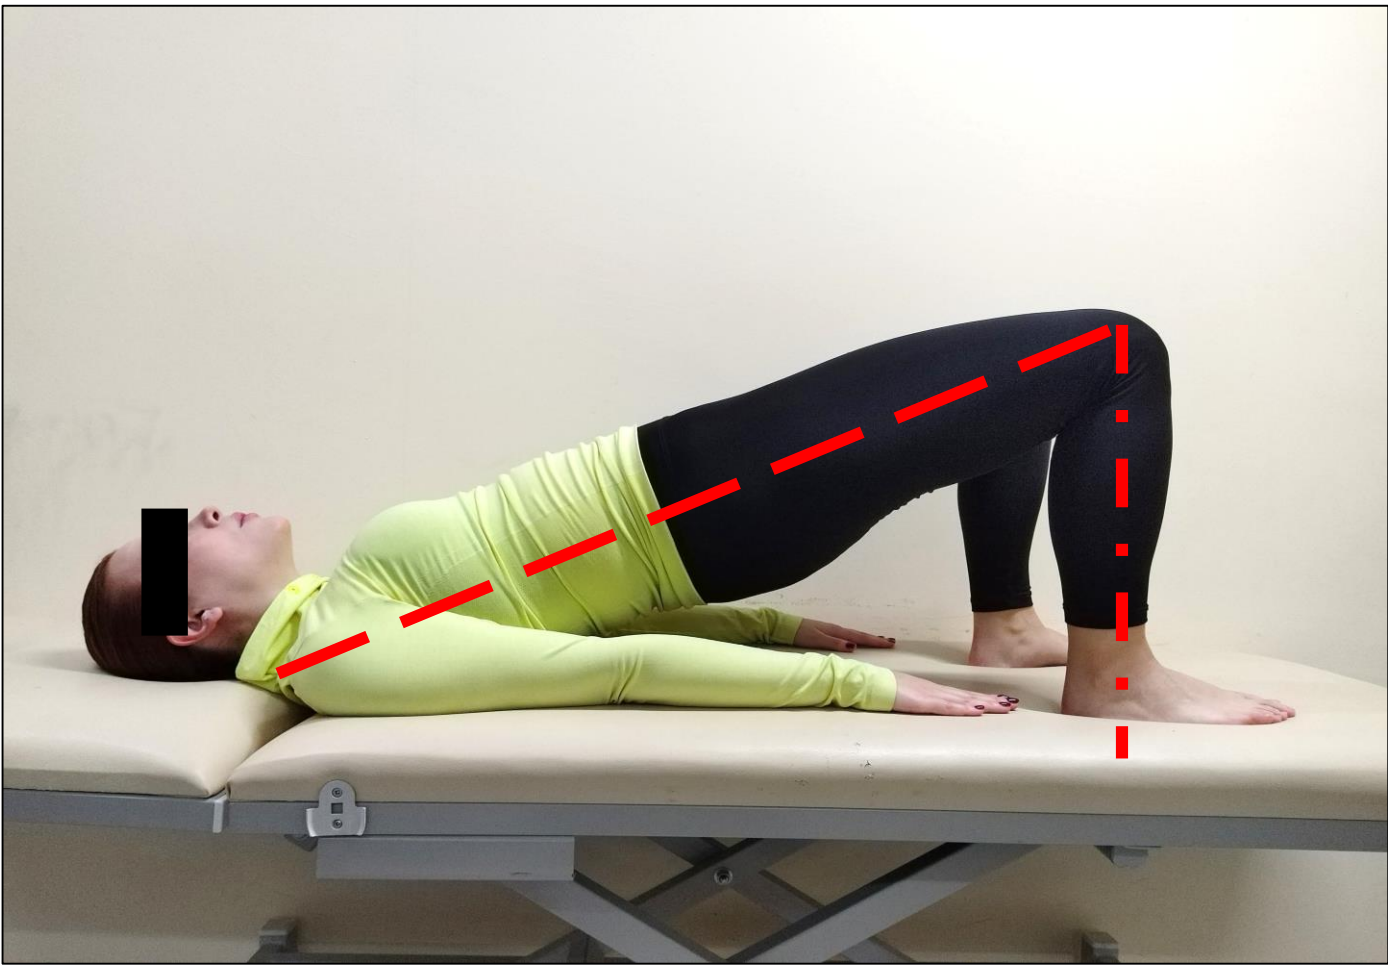

Pelvic Bridge

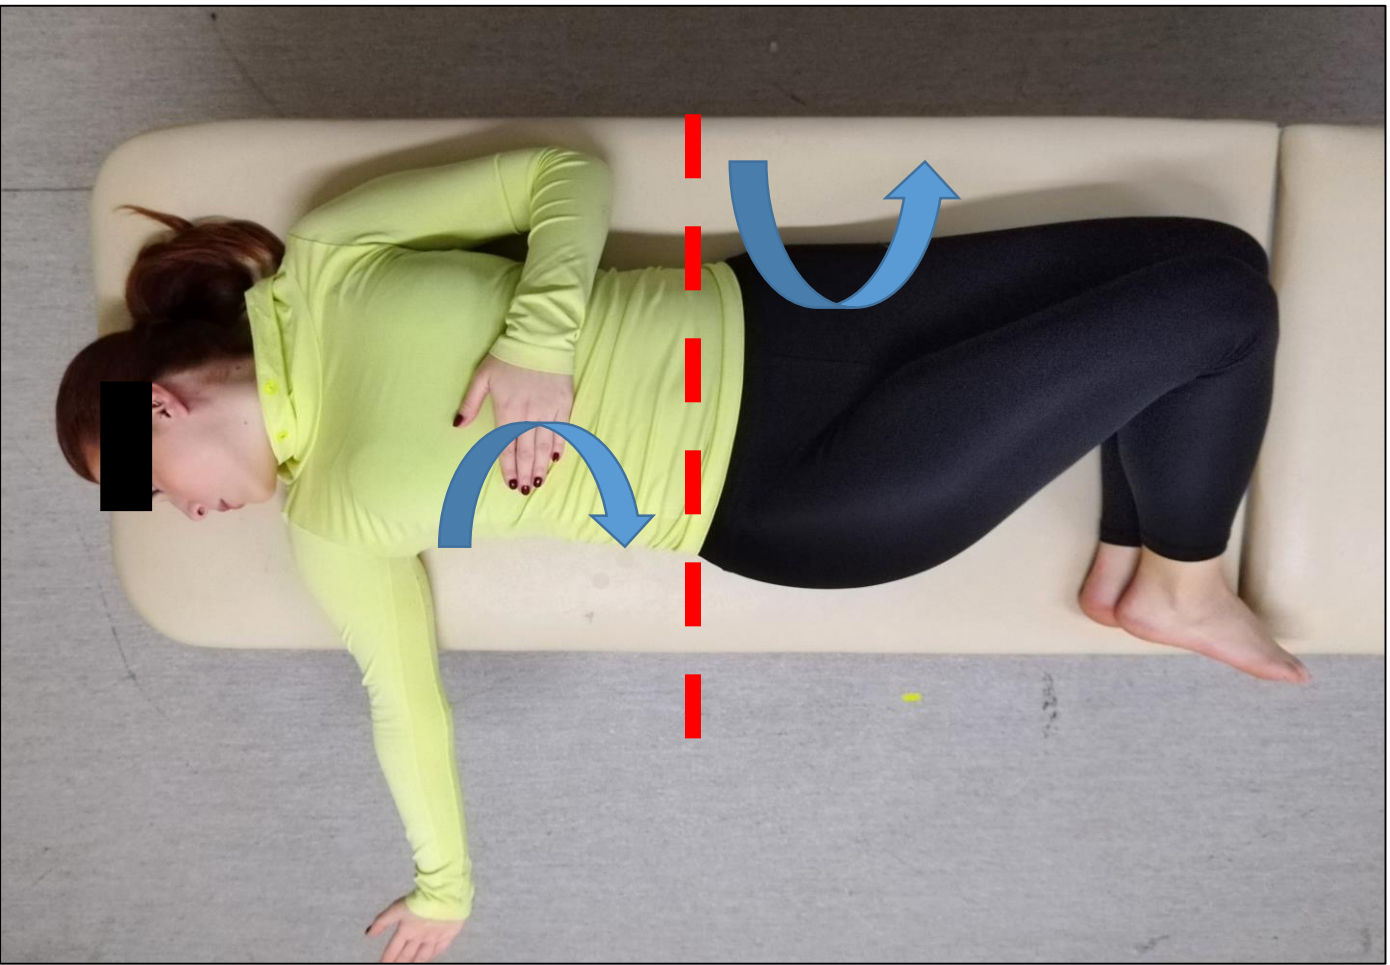

Bilateral Lumbar Rotation Stretching

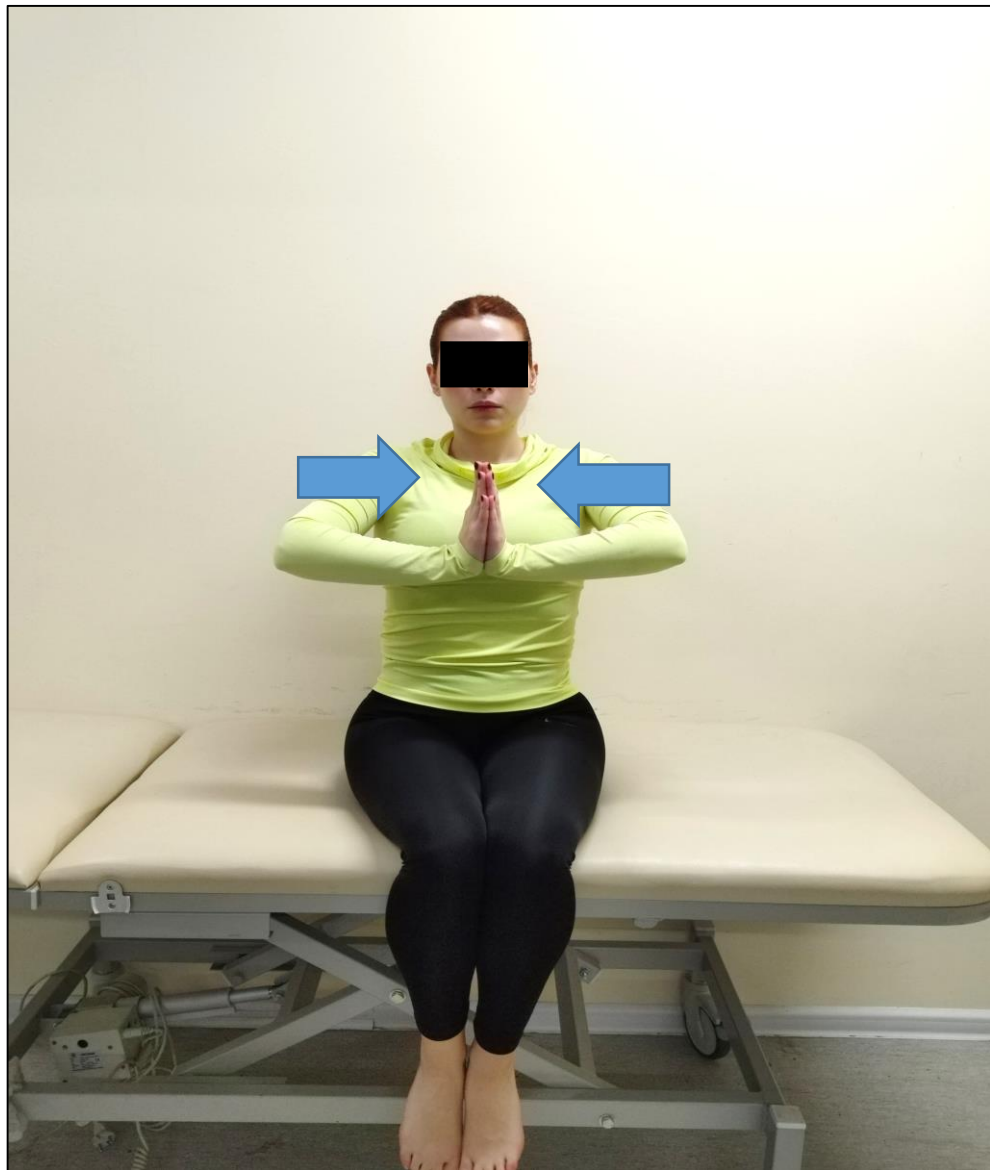

Hand Compression

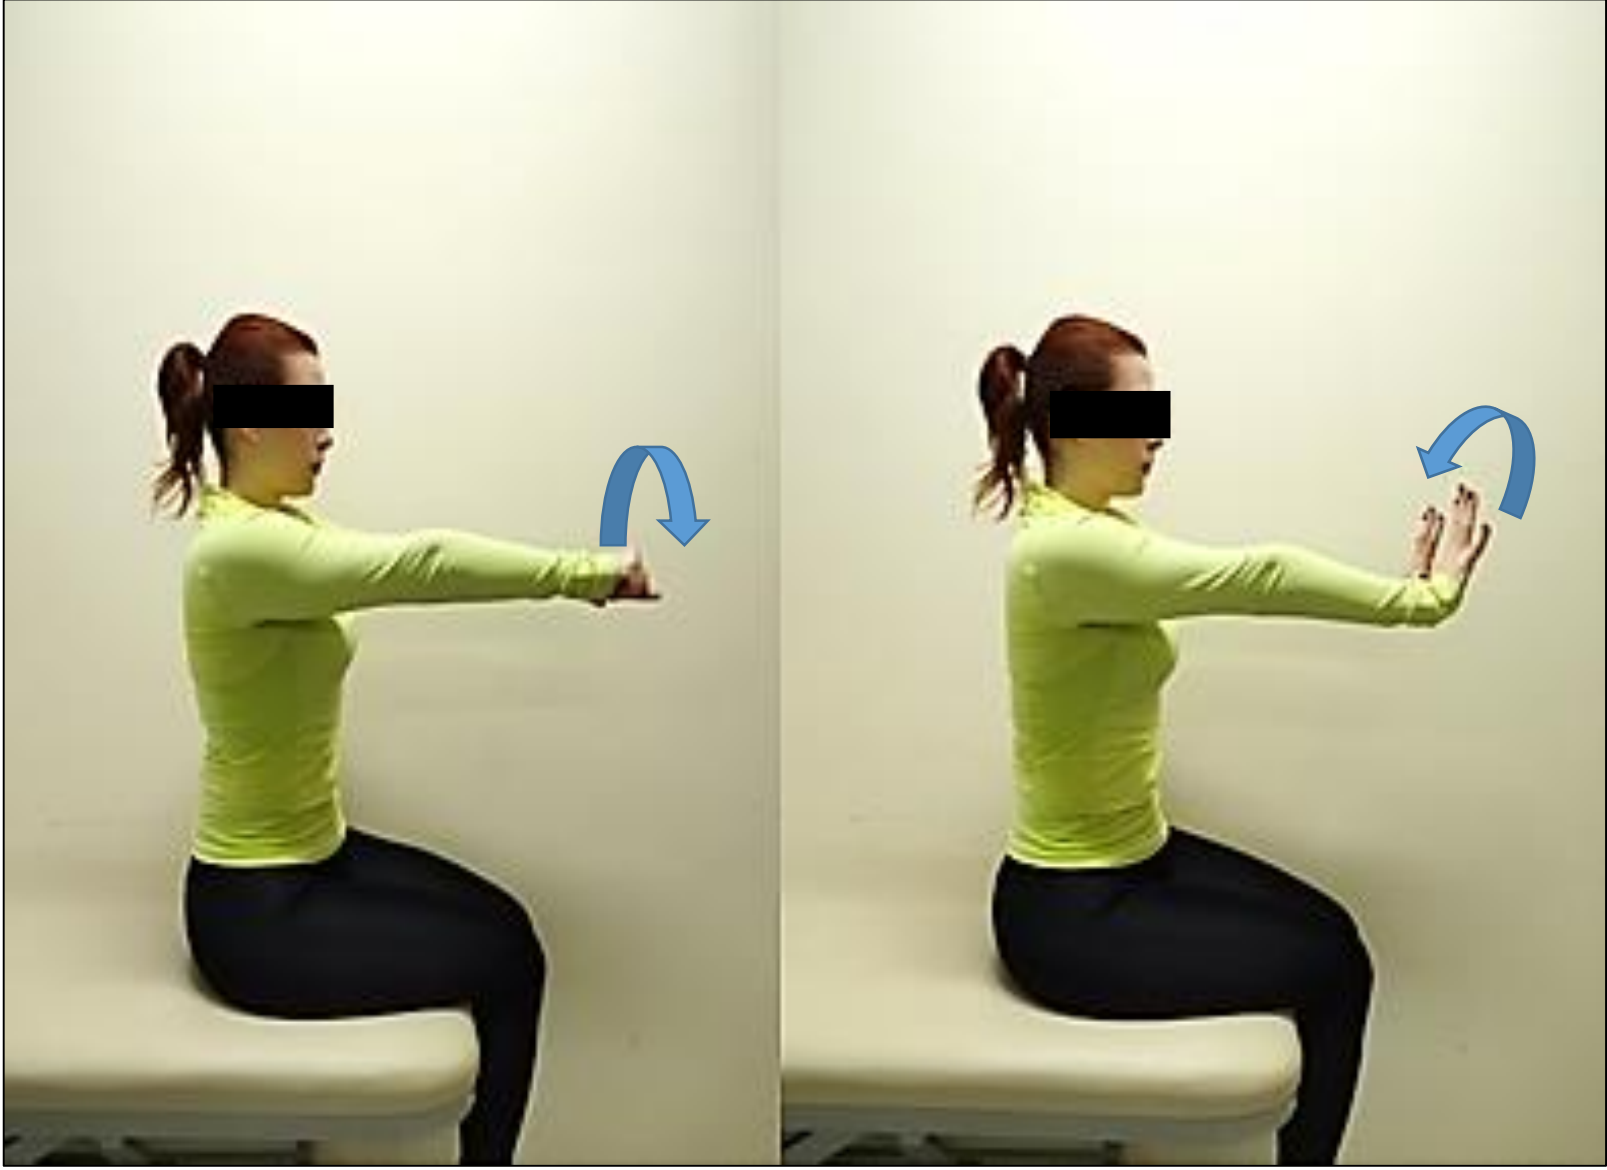

Hand Pumps with Arms Elevated Forwards



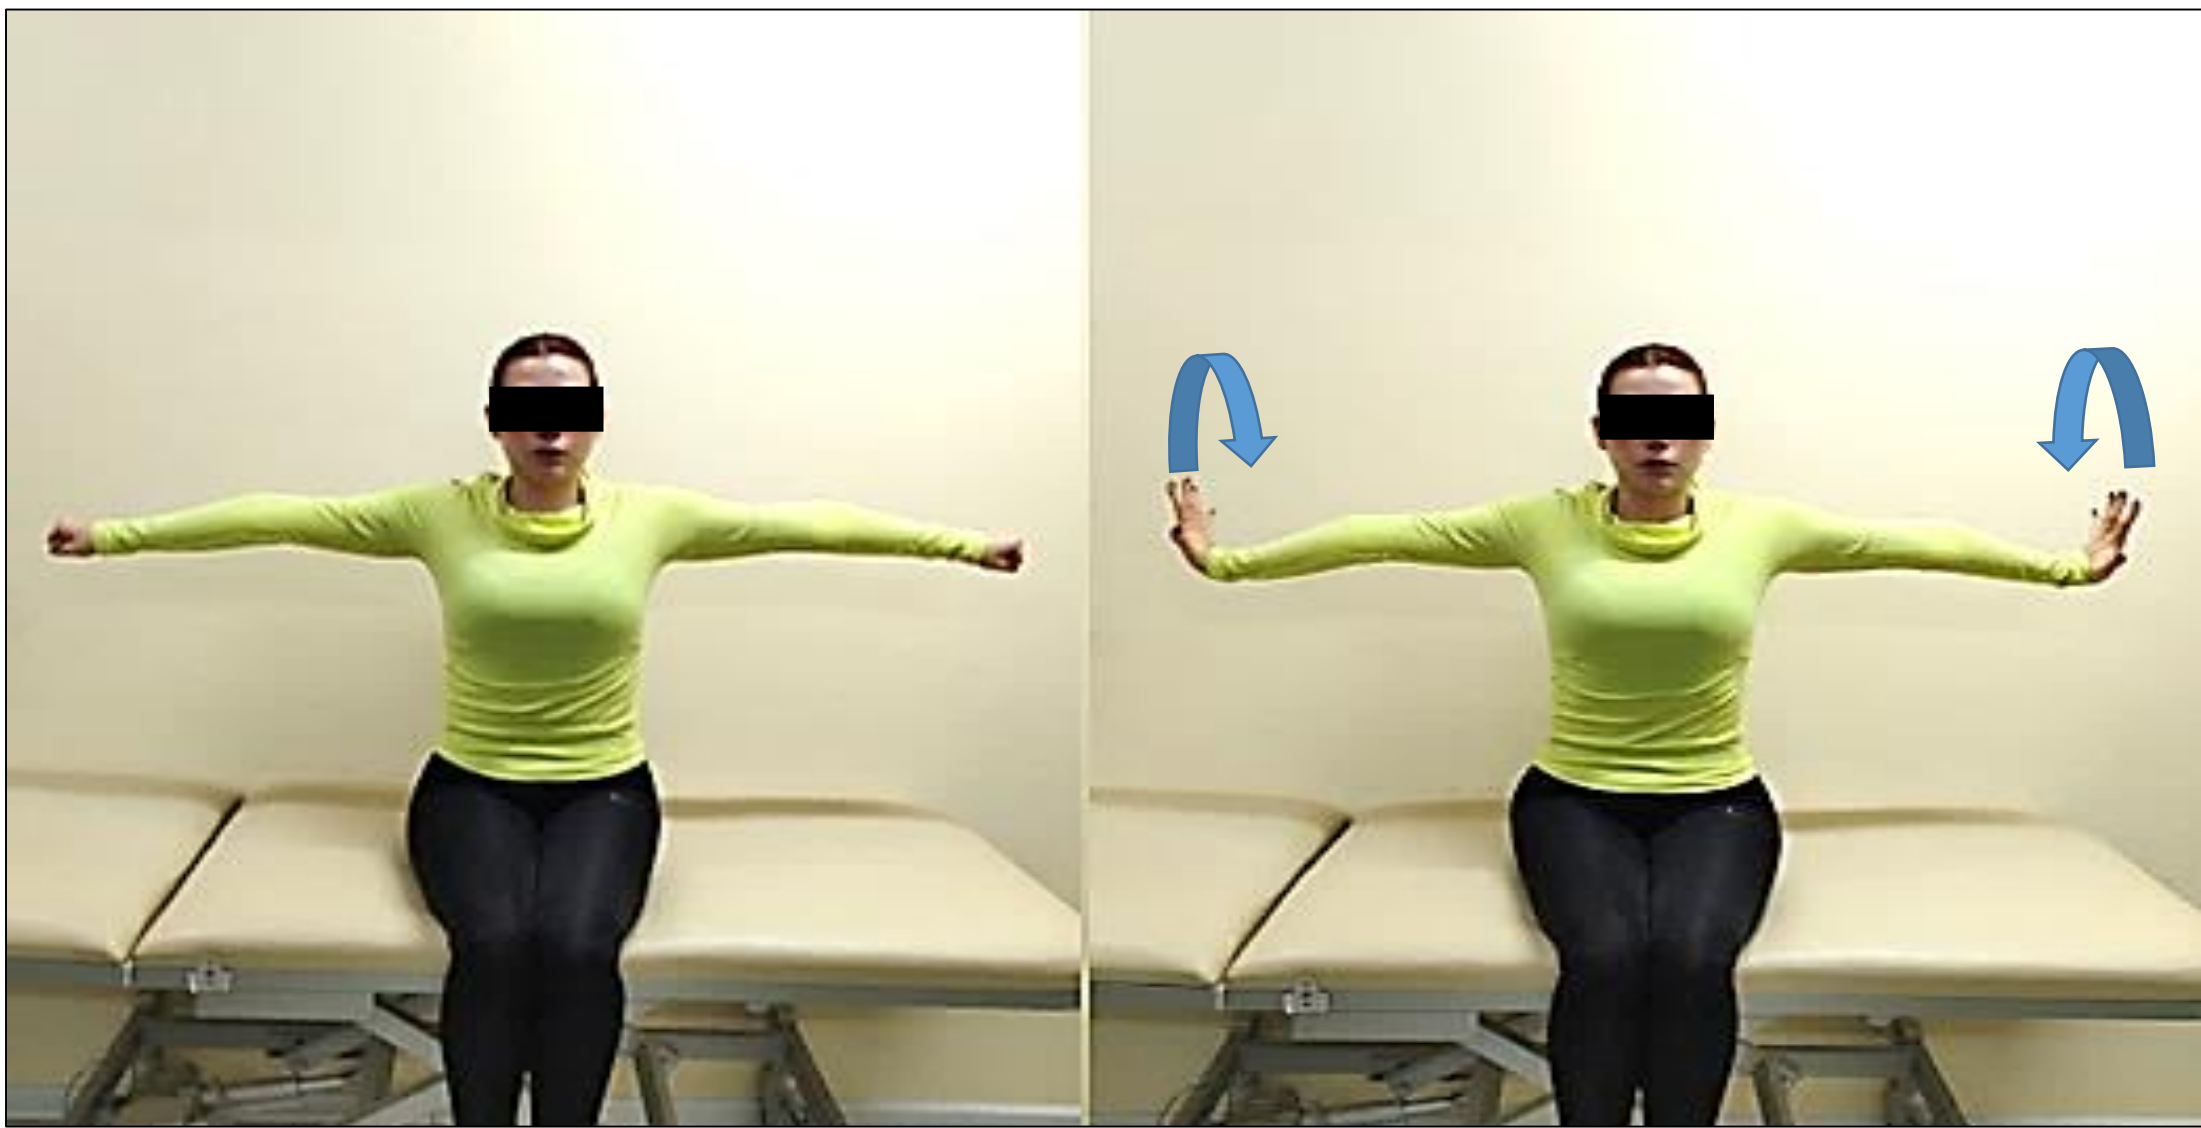

Hand Pumps with Arms Elevated to Side

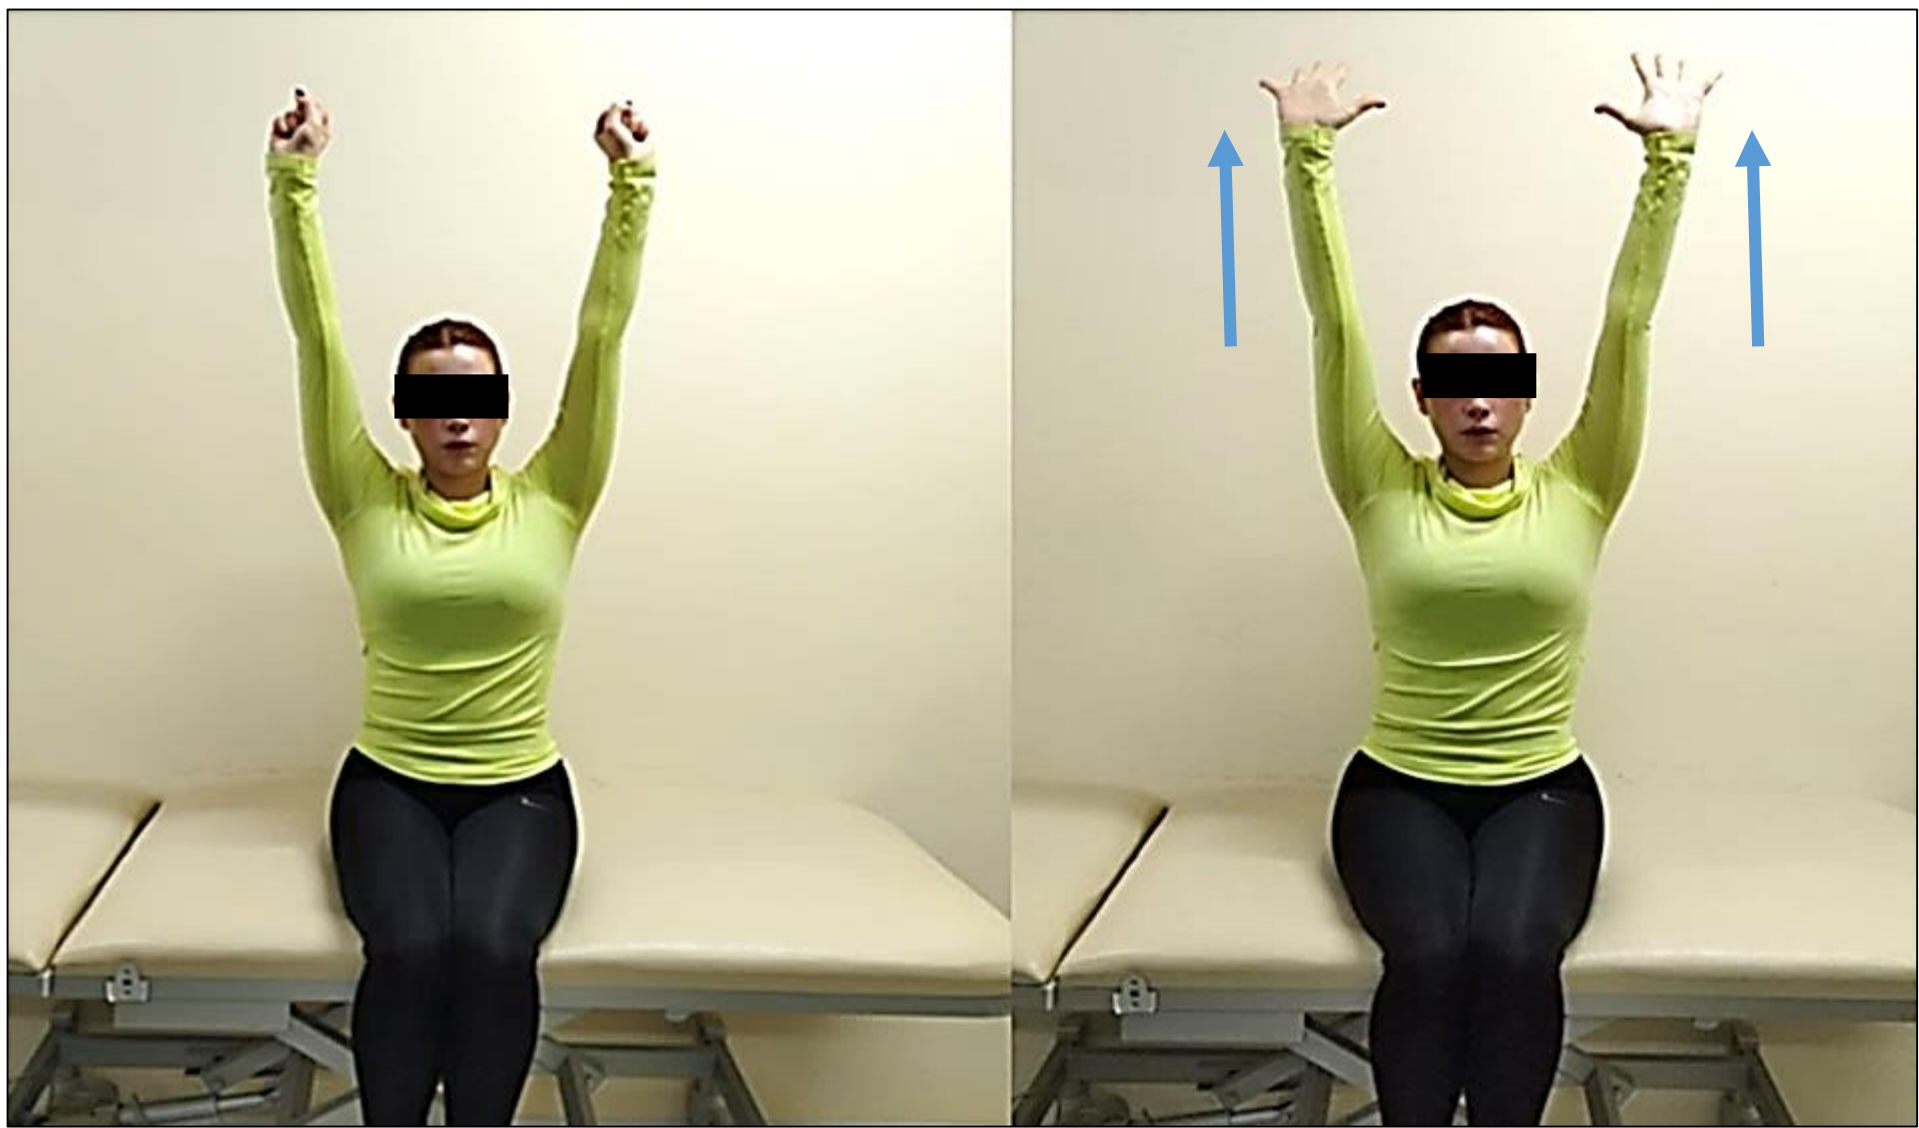

Hand Pumps with Arm Elevated Upwards

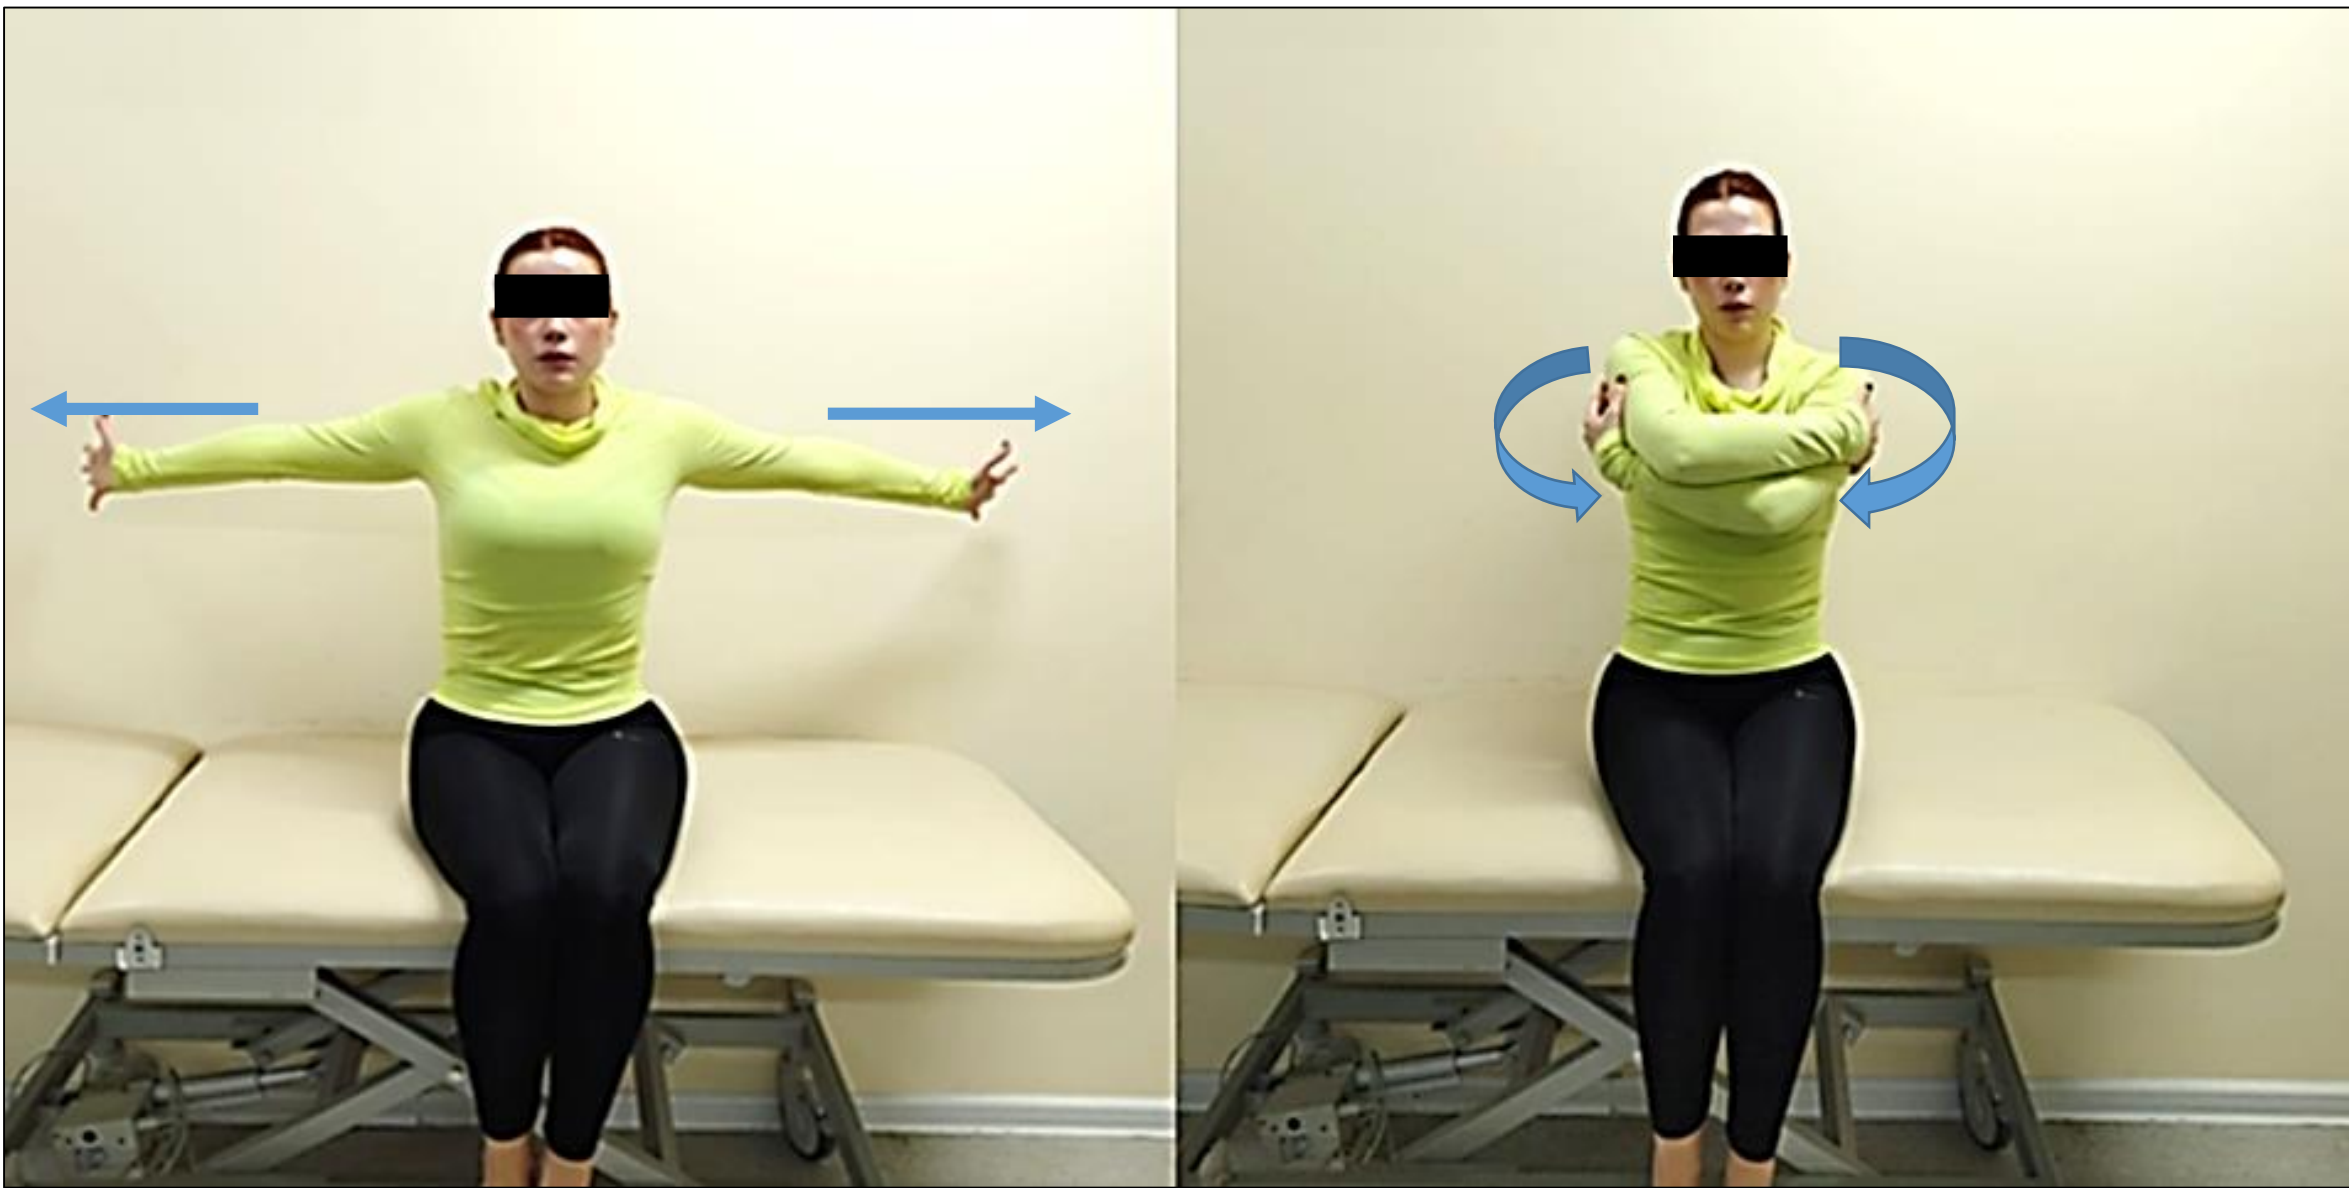

Arm Hug

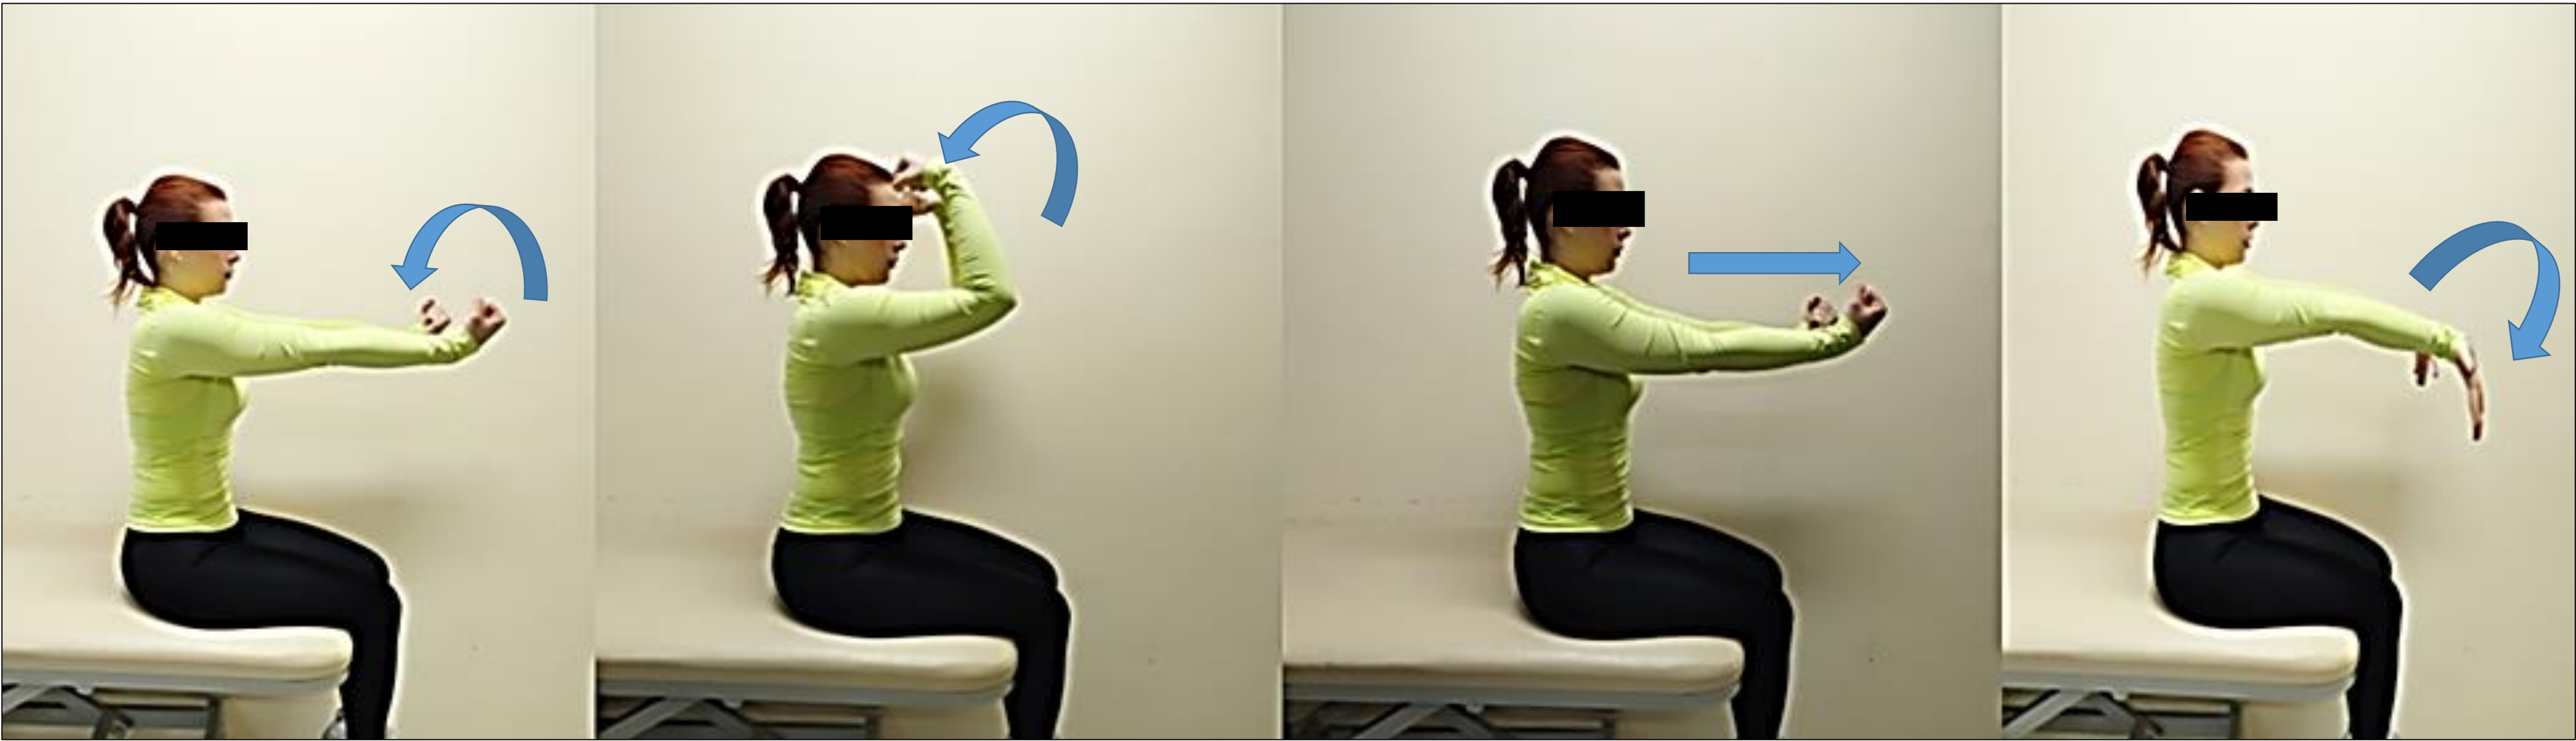

Dynamic Arm Stretching
